# Supplementary material for: Parechovirus infection in human brain organoids: host innate inflammatory response and not neuro-infectivity correlates to neurologic disease
Source: Springer Nature journal article supplement (doi:10.1038/s41467-024-46634-9), 2024-03-21
Supplement: 41467_2024_46634_MOESM3_ESM.pdf [file 41467_2024_46634_MOESM3_ESM.pdf]

## Description of additional supplementary files

**Title: Supplementary Data 1.**

**Description: Allocation of specific DAPs represented in Venn diagram (Figure 3c).**

**Title: Supplementary Data 2.**

**Description: Allocation of specific DAPs represented in Venn diagram (Figure 5c).**

**Title: Supplementary Movie 1.**

**Description:** Representative video of a UNO section (20  $\mu\text{m}$ ). Note the astrocyte-rich areas (GFAP, red) and neuron-rich areas (MAP2, magenta) located outside the ventricular zones, high in neural progenitor cells (SOX2, yellow).

**Title: Supplementary Movie 2.**

**Description:** Representative video of PeV-A1 infected UNOs and stained for nuclei (cyan), and immunolabelled for PeV-A1 VP1 (magenta) and dsRNA (yellow).

**Title: Supplementary Movie 3.**

**Description:** Representative video of PeV-A3 infected UNOs and stained for nuclei (cyan), and immunolabelled for PeV-A3 VP3 (magenta) and dsRNA (yellow).
